# Supplementary material for: Gate-voltage-modulated electrostatic interaction between the probe and the channel material of FET biosensors for detecting telomerase
Source: Royal Society of Chemistry journal article supplement (doi:10.1039/d3cc00486d), 2023-01-01
Supplement: d3cc00486d1.pdf [file d3cc00486d1.pdf]

## Supporting Information

### **Gate-Voltage Modulated Electrostatic Interaction between Probe and Channel Material of FET Biosensors for Detecting Telomerase**

Hongyuan Zhang,<sup>a</sup> Zhi Zheng,<sup>\*a</sup> Zhicheng Zhang,<sup>a</sup> Liang Hai,<sup>a</sup> Haiyang Li,<sup>a</sup> Shenghong Liu,<sup>b</sup> Xiaoding Lou,<sup>a</sup> Tianyou Zhai<sup>b</sup> and Fan Xia<sup>a</sup>

<sup>a</sup> State Key Laboratory of Biogeology and Environmental Geology, Engineering Research Center of Nano-Geomaterials of the Ministry of Education, Faculty of Materials Science and Chemistry, China University of Geosciences, Wuhan 430074, China.

<sup>b</sup> State Key Laboratory of Material Processing and Die & Mould Technology, School of Materials Science and Engineering, Huazhong University of Science and Technology, Wuhan 430074, China.

\* E-mail: zhengzhi@cug.edu.cn

## Table of Content

|                                                                              |    |
|------------------------------------------------------------------------------|----|
| 1. Experimental Procedures .....                                             | 3  |
| 1.1 Materials:.....                                                          | 3  |
| 1.2 Fabrication of In <sub>2</sub> O <sub>3</sub> FET: .....                 | 3  |
| 1.3 Fabrication of side-gate FET biosensors:.....                            | 3  |
| 1.4 Characterization of FET biosensors: .....                                | 3  |
| 1.5 Cell culture: .....                                                      | 4  |
| 1.6 Telomerase extraction: .....                                             | 4  |
| 1.7 Telomerase Extension Reaction:.....                                      | 4  |
| 1.8 Telomerase Detection by FET biosensors: .....                            | 4  |
| 2. Figures and Tables .....                                                  | 5  |
| Fig. S1. Nondenaturing PAGE analysis of telomerization process. ....         | 5  |
| Table S1. Oligonucleotides used in this study. ....                          | 6  |
| Fig. S2. Fluorescent intensity indicate the height of ssDNA. ....            | 7  |
| Fig. S3. Time domain device response under different gate voltage. ....      | 8  |
| Fig. S4. Nonlinear fit of device signal change. ....                         | 9  |
| Fig. S5. The repulsive interaction while Debye length up to 7.53 nm.....     | 10 |
| Fig. S6. The efficient charge of ssDNA under different debye length. ....    | 11 |
| Fig. S7. Current change under different time of telomerization process. .... | 12 |
| Fig. S8. Linear range, sensitivity and LOD under different pH.....           | 13 |
| Fig. S9. Current response in response to cancer and normal cells.....        | 14 |
| Fig. S10. Inhibition of telomerase activity by AZT and heat.....             | 15 |
| 3. References .....                                                          | 16 |

# 1. Experimental Procedures

## 1.1 Materials:

Ultrapure water from Millipore filtration system (Millipore, Bedford, MA, United States) source was used for the experiments. Indium (III) nitrate hydrate ( $\text{In}(\text{NO}_3)_3 \cdot x\text{H}_2\text{O}$ ), (3-aminopropyl)trimethoxysilane (APTMS), trimethoxy(propyl)silane (PTMS), 3-maleimidobenzoic acid N-hydroxysuccinimide ester (MBS) and 1-dodecanethiol were purchased from Sigma-Aldrich (Shanghai) Trading Co., Ltd. The deoxynucleotide solution mixture (dNTPs), RNase inhibitor, DEPC-treated water, and 1× CHAPS lysis buffer were purchased from Sangon Biotech (Shanghai, China; DEPC = diethylpyrocarbonate).

## 1.2 Fabrication of $\text{In}_2\text{O}_3$ FET:

Firstly, the  $\text{In}(\text{NO}_3)_3$  thin films were fabricated through spinning-coating 1 mM  $\text{In}(\text{NO}_3)_3 \cdot x\text{H}_2\text{O}$  solutions with 4000 rpm for 60 s on a 300 nm-thick  $\text{SiO}_2$ /heavily doped silicon wafers. Then, the  $\text{In}_2\text{O}_3$  thin films were fabricated through prebaking at 150 °C for 10 min, and thermal annealing at 350 °C for 3 h. The interdigitated device with side-gate electrodes (80 μm width channel distance) was fabricated through standard photolithography (MDA-400M) followed by depositing 10 nm Ti /40 nm Au on  $\text{In}_2\text{O}_3$  thin film (Angstrom Engineering).

## 1.3 Fabrication of side-gate FET biosensors:

Briefly, spacer molecules of mixed (3-aminopropyl)triethoxysilane (APTMS) and (trimethoxy(propyl)silane (PTMS) solutions with 1:9 v/v ratio were decorated on  $\text{In}_2\text{O}_3$  surfaces by thermally evaporation at 40 °C for 1 h, then 1-dodecanethiol (DDSH) molecules incubated in 1 mM ethanolic solutions were modified to passivate Au electrodes for 1 h. The 1 mM linker molecules of 3-maleimidobenzoic acid N-hydroxysuccinimide ester (MBS) in a 1:9 (v/v) mixture of dimethyl sulfoxide and phosphate buffer saline (PBS) were decorated on spacer molecules for 30 min. The decorated FET devices were immersed in 1 μM thiolated telomerase primer solutions for about 18 h, then followed by rinsing again with deionized water and dried by blowing dry  $\text{N}_2$  gas. The sequences of the TS used in the study are as follows: 5'-HS(CH<sub>2</sub>)<sub>6</sub>TTTTTTAATCCGTCGAGCAGAGTT-3'.

## 1.4 Characterization of FET biosensors:

The height of telomerase primer before and after telomerase extension is characterized by atomic force microscopy (AFM). We molecularly labeled a quencher group black hole quencher 1 (BHQ1) and fluorescence group hexachlorofluorescein (HEX) respectively at the both ends of quenching fluorescence sequence (QFS). The emission of HEX ( $\lambda_{\text{max}} = 556 \text{ nm}$ ) and the absorption of BHQ1 ( $\lambda_{\text{max}} = 534 \text{ nm}$ ) have a high degree of overlap. QFS contains TS sequence and three repeated units TTAGGG, which is used to simulate the telomerization process. Fluorescence and quencher groups labeled at both ends are used to indicate the variation of distance between 3'-end and 5'-end under different gate voltage conditions. The result of extended ssDNA by telomerase was verified by the nondenaturing polyacrylamide gel electrophoresis analysis.

### **1.5 Cell culture:**

Hepatoma cells (HepG2, obtained from China Center for Type Culture Collection, Wuhan, Hubei, China) and cervical cancer cells (HeLa, obtained from China Center for Type Culture Collection, Wuhan, Hubei, China) were cultured in 1640 (GIBCO) medium with 1% penicillin streptomycin (PS, 10000 IU penicillin and 10 000  $\mu\text{g}/\text{mL}$  streptomycin, Multicell) and 10% fetal calf serum (FCS, Shanghai Yuanye Biotechnology Co. LTD) in a culture flask at 37 °C in a humidified atmosphere containing 5%  $\text{CO}_2$ . Breast cancer cells (MCF-7, obtained from China Center for Type Culture Collection, Wuhan, Hubei, China) were cultured similarly in Dulbecco's modified Eagle's medium (DMEM, Multicell). human lung fibroblast cells (HLF, obtained from China Center for Type Culture Collection, Wuhan, Hubei, China) were cultured similarly in minimum essential medium (MEM/EBSS, 1 $\times$ , HyClone).

### **1.6 Telomerase extraction:**

Cultured cells were first suspended in 1 $\times$  CHAPS lysis buffer to make the concentrate 5000 cells/ $\mu\text{L}$  and incubated on ice for 30 min. Then, the mixture was centrifuged at 12 000 g for 20 min at 4 °C. Finally, the supernatant was transferred, aliquoted, and stored at -80 °C.

### **1.7 Telomerase Extension Reaction:**

The telomerization reaction was performed by using TS modified FET, in the presence of dNTP (2 mM), RNase inhibitor (1 U/ $\mu\text{L}$ ) and telomerase solution (20 mM Tris-HCl buffer, pH 7.8, 1.5 mM  $\text{MgCl}_2$ , consisted of telomerase extracts from the specified number of cancer cells) at 37 °C for 40 min.

### **1.8 Telomerase Detection by FET biosensors:**

Polydimethylsiloxane (PDMS) wells were used to separate PBS buffer solution on top of individual FET electrodes. The electrical measurements were performed on low temperature analytical probe stations (CRX-6.5K, Lake Shore) with a semiconductor parameter analyzer (4200-SCS, Keithley). The transfer curves with 0 to 0.8 V gate voltages and 10 mV drain voltage were obtained. At the same time, the real-time measurements were held at 0.4 V gate voltages and 0.01 V drain voltage.

2. Figures and Tables

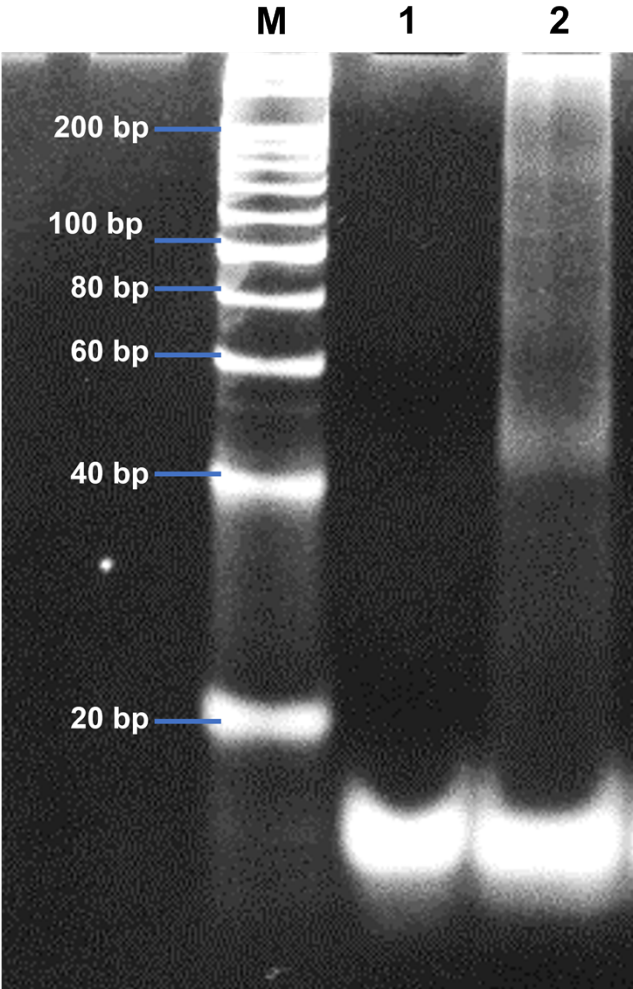

Fig. S1. Nondenaturing PAGE analysis of telomerization process: DNA ladder marker (lane M), TS primer in the absence (lane 1) and presence (lane 2) of telomerase extracts from 20000 HepG2 cells.

Table S1. Oligonucleotides used in this study.

| Name | Sequence (5'to3')                                                                                       | Length (nt) | Purify method |
|------|---------------------------------------------------------------------------------------------------------|-------------|---------------|
| TP   | 5'-HS(CH <sub>2</sub> ) <sub>6</sub> TTTTTTAATCCGTCGAGCAGAGTT-3'                                        | 24          | HPLC          |
| QFS  | 5'-HS(CH <sub>2</sub> ) <sub>6</sub> TTTTTTAA/iBHQ1dT/CCGTCGAGCAGAG<br>TTTTAGGGTTAGGGTTAGGGTTAGGG-(HEX) | 42          | HPLC          |

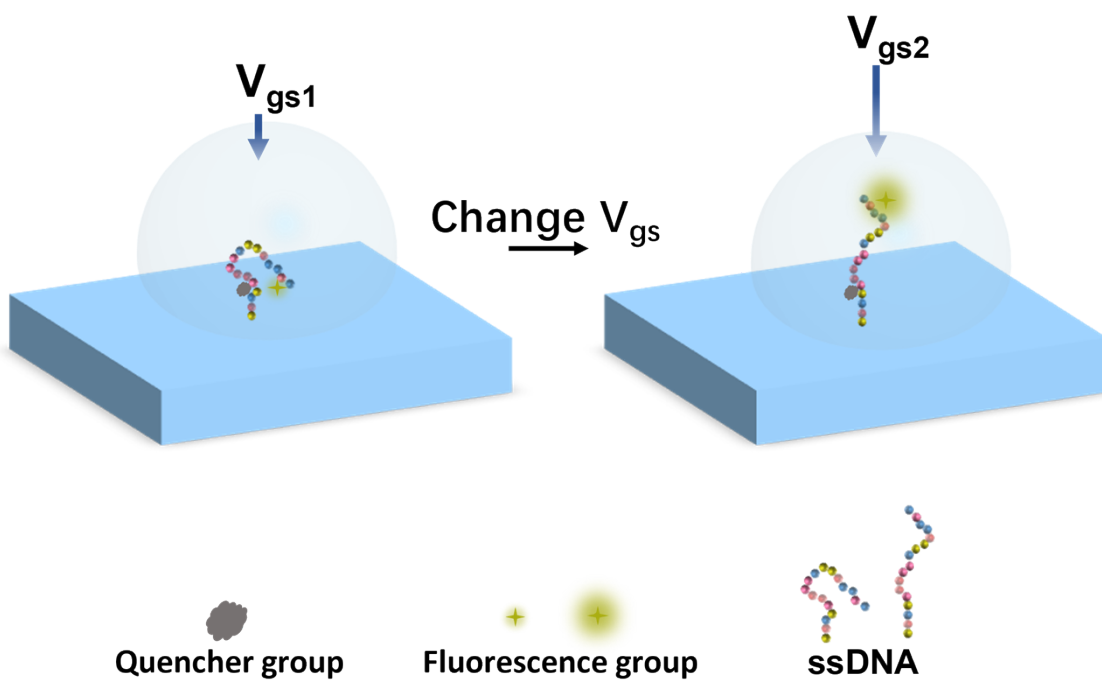

Fig. S2. Testing the changes of fluorescent intensity generated by the variation of the distance between the fluorescence group and quenching group under different gate voltage.

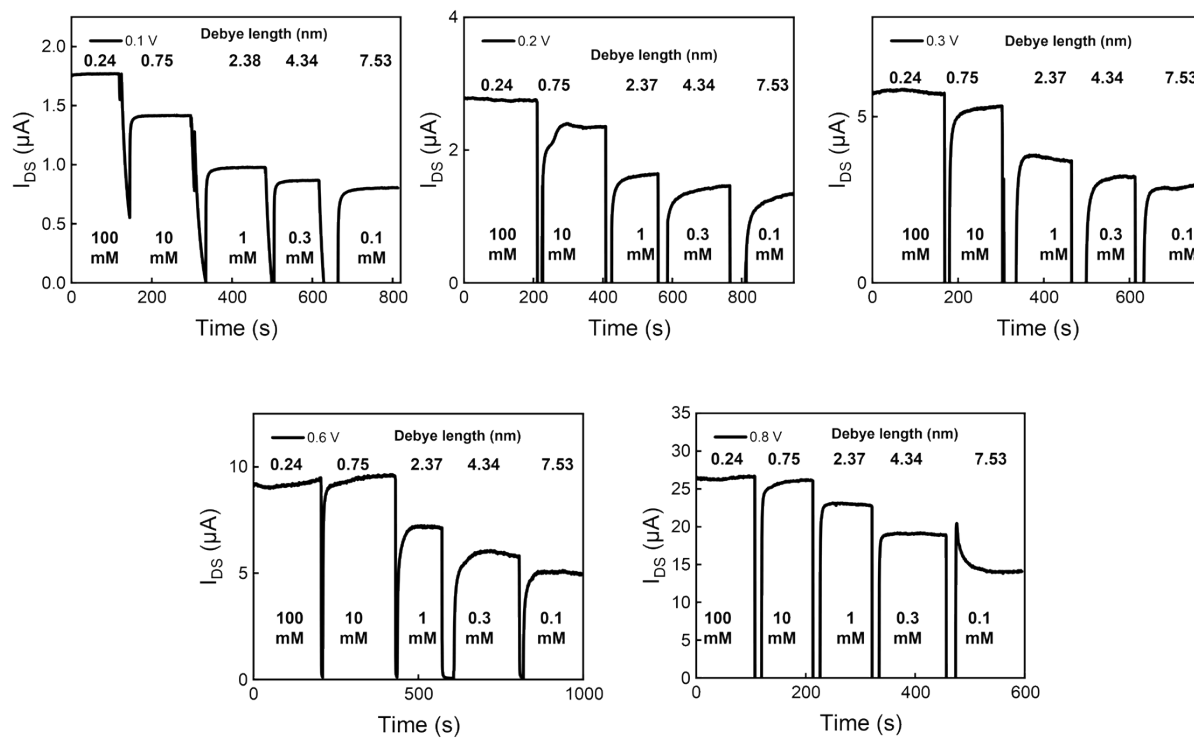

Fig. S3. Debye length modulation. Time domain device response after telomerization process under different gate voltage, followed by PBS buffer exchange to 100, 10, 1, 0.3 and 0.1 mM.



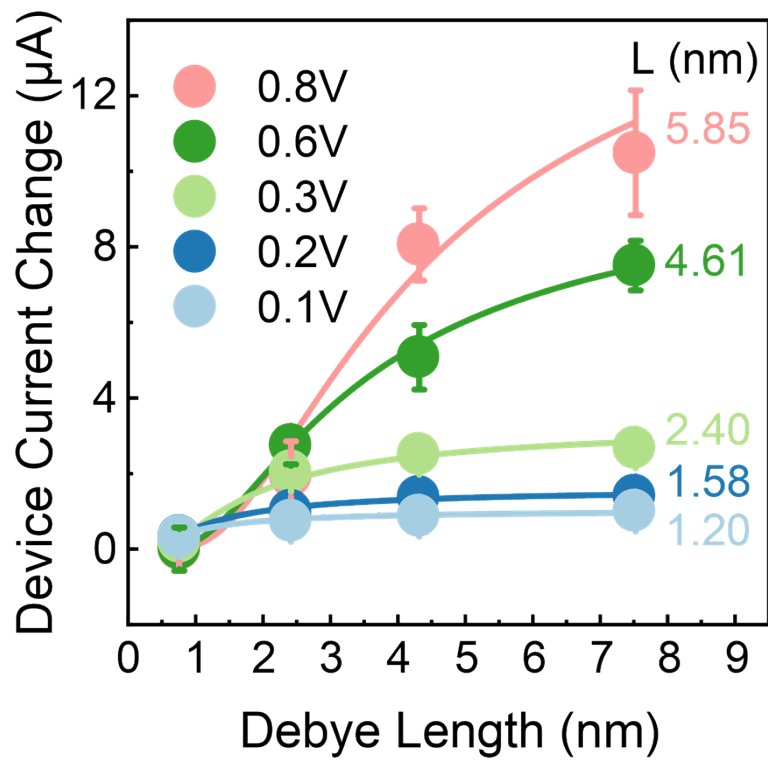

Fig. S4. Nonlinear fit of device signal change versus the debye length according to formula 2 in the main text. Fitting parameters are  $L=1.20, 1.58, 2.40, 4.61$  and  $5.85$  nm while gate voltage is  $0.1, 0.2, 0.3, 0.6$  and  $0.8$ V.

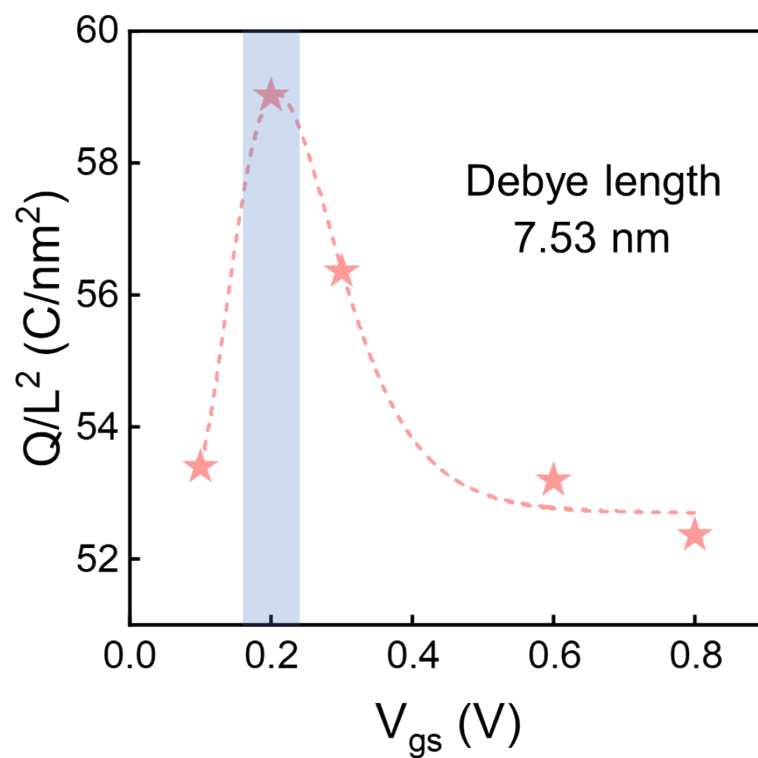

Fig. S5. The repulsive interaction between the ssDNA probe and the  $\text{In}_2\text{O}_3$  channel under the interaction of gate voltage while Debye length up to 7.53 nm.

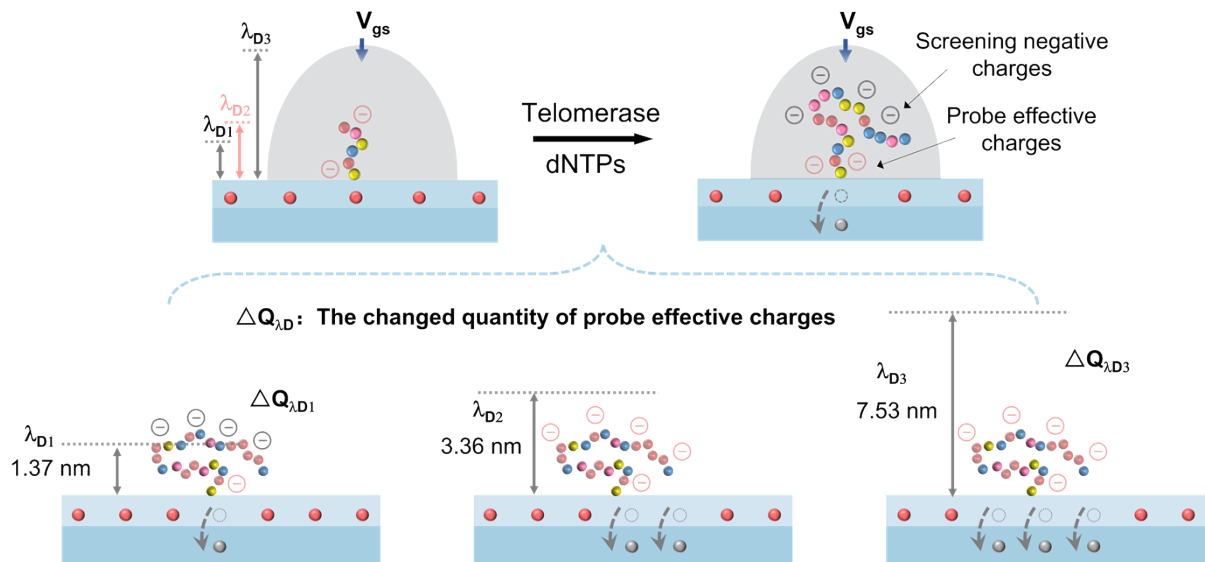

Fig. S6. The efficient charge of ssDNA while detecting telomerase under different debye length conditions (1.37 nm, 33.6 nm, and 7.53 nm).

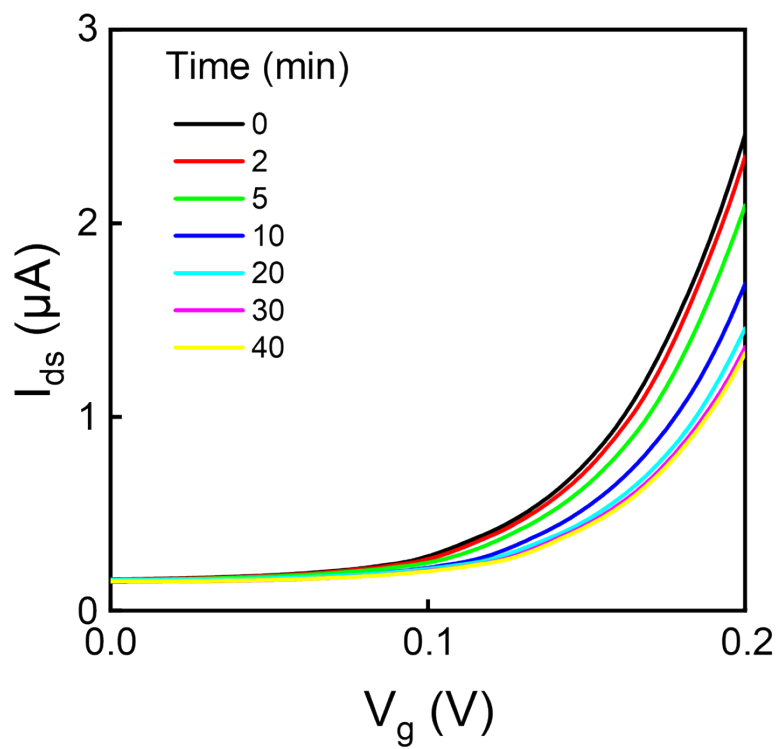

Fig. S7. The current change while detecting HepG2 telomerase under different time of telomerization process (2, 5, 10, 20, 30, and 40 min).

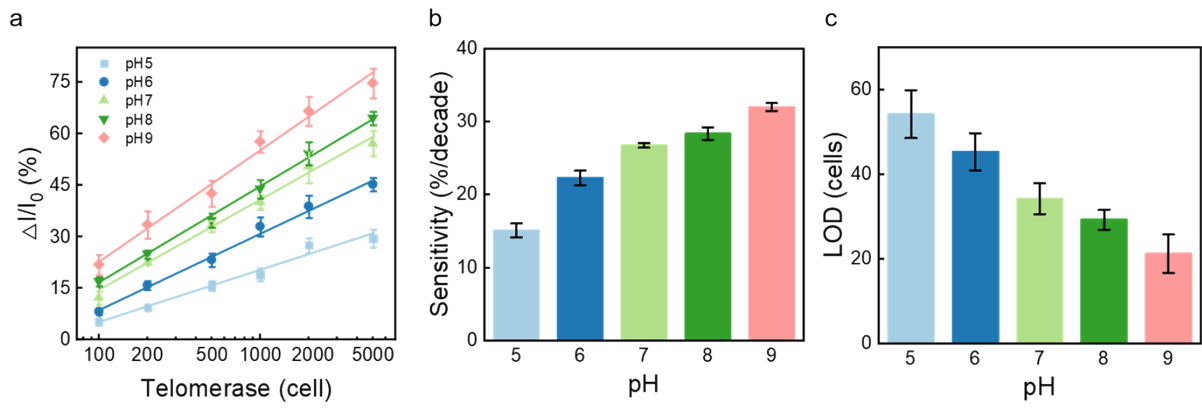

Fig. S8. The linear range (a), sensitivity (b), and LOD (c) of detecting telomerase under different pH (5-9).

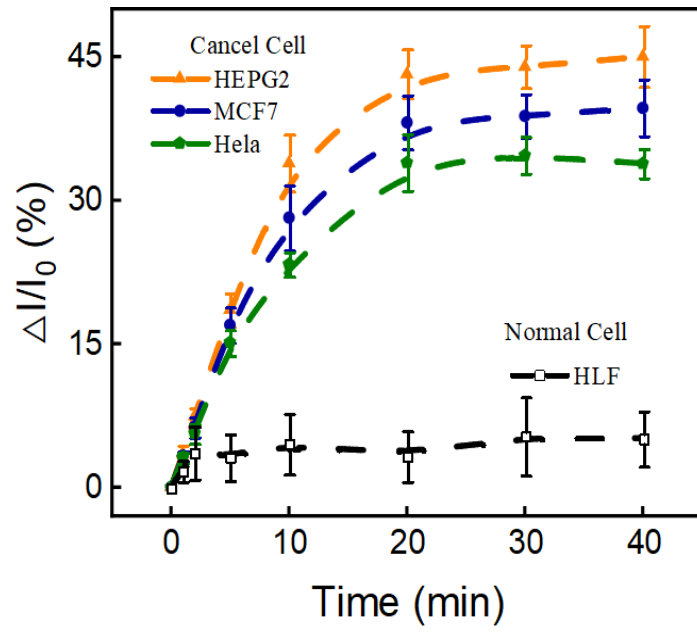

Fig. S9. Due to the lack of telomerase activity in normal cells, the sample of HLF do not show obvious change in current signal even incubation time was extended to 40 minutes.

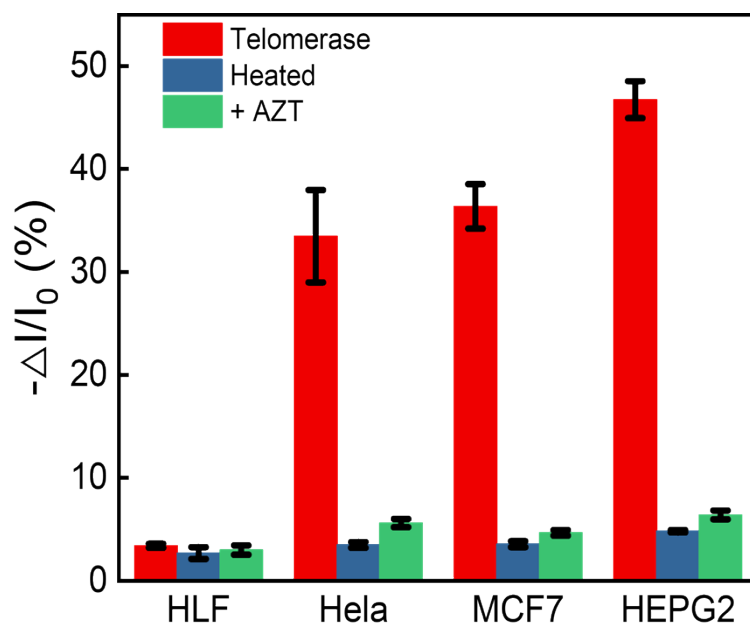

Fig. S10. The current changes of detecting telomerase from HLF, HeLa, MCF7 and HepG2 and the comparison with the results after being heated at 95 °C and inhibited by AZT.

### 3. References

1. R. Díaz-Ayala, M. López-Nieves, E. S. Colón Berlingeri, C. R. Cabrera, L. Cunci, C. I. González and P. F. Escobar, *ACS Omega*, 2022, **7**, 9964-9972.
2. E. Sharon, R. Freeman, M. Riskin, N. Gil, Y. Tzfati and I. Willner, *Anal. Chem.*, 2010, **82**, 8390-8397.
3. Z. Zhang, E. Sharon, R. Freeman, X. Liu and I. Willner, *Anal. Chem.*, 2012, **84**, 4789-4797.
4. R. Duan, B. Wang, T. Zhang, Z. Zhang, S. Xu, Z. Chen, X. Lou and F. Xia, *Anal. Chem.*, 2014, **86**, 9781-9785.
5. E. Sharon, E. Golub, A. Niazov-Elkan, D. Balogh and I. Willner, *Anal. Chem.*, 2014, **86**, 3153-3158.
6. X. Xu, L. Wang, K. Li, Q. Huang and W. Jiang, *Anal. Chem.*, 2018, **90**, 3521-3530.
7. X. Xu, M. Wei, Y. Liu, X. Liu, W. Wei, Y. Zhang and S. Liu, *Biosens. Bioelectron.*, 2017, **87**, 600-606.
8. H.-R. Zhang, Y.-Z. Wang, M.-S. Wu, Q.-M. Feng, H.-W. Shi, H.-Y. Chen and J.-J. Xu, *Chem. Commun.*, 2014, **50**, 12575-12577.
9. R. Freeman, E. Sharon, C. Teller, A. Henning, Y. Tzfati and I. Willner, *ChemBioChem*, 2010, **11**, 2362-2367.
